# Supplementary material
Source: MDPI journal article supplement (https://www.mdpi.com/2311-7524/9/4/511)
Supplement: s1 [file s1]

Archive with 5 entries (5 files):
- Supplementary file 1.xlsx
- Supplementary file 2.pdf
- Supplementary file 3.xlsx
- Supplementary file 4.pdf
- Supplementary file 5.pdf
