# Supplementary material
Source: MDPI journal article supplement (https://www.mdpi.com/2311-7524/9/4/511)
Supplement: s1 [file s1 › Supplementary file 1.xlsx]

## Sheet: Sheet1
Each exon sequences of four StSPS family genes
Strand	Gene	PGSC No.	No. of exons
			13	12	11	10	9	8	7	6	5	4	3	2	1
‘-’strand	StSPS1	Soltu.DM.07G003160.1	TTATCCTTTGAGTACCGCTAGTTTCACCAGTAAGCTACGGATTTCGGTGCTGCTACATTC CTCGTCCGCTTGGATGACATTAGGGCTGTCGAATGGTAAAACATCAGATAGCGGGTAATT CCTATTACCGTGAATTAAGCTGCTTGCATTAGTGCAGAGTCCTTTCATTATGACAGCCTT GCGTAGACCACCGATCAATCCTTCATAATCAGTATCACCACTTTCTCCGACGAAAACCAC CAACTTCGACAAGTCCATTCCCCATCGCAGATATAAGTAC	CTGAGTGCTTGGGACCGAGATGCCAGTACAGGGATCACATTAATCCTACTCCCATTTTGA CAATAAACAGCGTGACAACGAAGTGCCTGAATTCGCATTACTTTTCTAAGCTCTTTAGCT GGAGGAAC	CGTCCCAGGCTTGCAGACTTTGAAAGTATAGCAGTAGTCAGCTGAATTGTCTTCATCCTC AACAACAATGTGATCTCCATTTTCACCATTCTTATCAATGATAGAGGCGGCCCAACGCAC CAAAGTCTTTCTCAACCCTTCGCCCCCCCAACGATACTCAATATGTGAGTGATAGTACAA GTCAACTACAAAAGGATTTTGCTCAGAATGGAAGGACGAATAATAAAGATCACCACCACT ATTGCATATGTAAGCATCAAAATCAGTAGGATTCATGCCCTCTGAAAGCAGGAAAGACTG TACTTCTGATATATTGAAAGATGTAGCCAGGATAAATCCAATGGAACCTTCTGCCCTTTC CTTCTCTACAGCCTCAAATATCTTTTTCACACT…	CCTATGTATATCAACAGGTCCTCCATTTTTTGTGGCTACCATTGGGAGACCATAAGCTGC TGC	CTCAATCAAAGTCAGTCCAAAAGGCTCAATAAAAGCTGGATTAATAAAAACACC	CTTAGTCTTTGCAGCAAGACGGTAGATATCAGGAACATCTGACTGCTTGTGGTGTTTAGG ATAAGCTACTTGACCATAAAGATCATACTTATCTATCATCTTCAAGATTGAAAGAAGAAG TGCAGAATTGGTGCTAGACATTTCGTCGATATTATCTCGATTACCCATTATCAAAGT	AAGATTAGCAAGCTCTCTCAATGGACGACATTCACCAAATGCTTTCACTAAAGTAGTGAG GTTCTTCTTGGGATCAGGCCTAGCAAGTGCGAGTATCATAGGCTTCCTTGGATTAGAAAA GAAGCGCATAAT	CTCTGCCCAAATAGGTGGATCCGGGGTCTTTCCATCTTCACTTCCTTCTGTTTCACCATC CATGTCACCTTCATGTGGCACAATATGGTGAAACTCCATCCCAGGAGGAATTAC	AGCCATACGAGGCATAAACCTGCCATAACAGCTGACATTGCGCTTTATCCTTGCACGTAA CTTACGCTCTAATATTGGATCAAACCCATCATACAAACGCCATTGCTCGTCAATCTCCTG TCTTGTACTAGTGATGACAATTTCGGAAGCATCAAGAGTTAATTCTTCAGCCTCTATTCT CCGCATTATCTTGTACGTTGAGTTTATTTCATCCTTTGACAAACGACCTTGTCGCAACAG TTGCTCCAACTTATCTCTACCAAGCGAGTGACCAGTGAAAAGCATTGGTACATTTAAAGC ACCCGACAGGAGAGCAGCTGAGTCGCCAGCATCAGCATAATGTCCATGTATGGCAACAGG CCACACAGGATAGCCACTACCAATTTGCTCACC…	CTGACCACCAGTATCAGAATCCCGTCCAAGCTCCATATTCTCACCCCGAATTAAACCATG TAAA	CTTATAAGCACGATATAAAGCTTCTTTCCTCTCTGCTGACTGACCCATGCTTCCATTGTC TCGACAGAACTGATTCTAGGCAATCGGCCTCTGGTACTTTCACCATGAGATGACATGTCA GCGACTATATCTCCTTTCTCTCCCTCAGATAGATCCTCTGACATATCAGCAACTGCTTCT CTGCGACCTCTCTCACGTTCTTGACGGCGTTTTGCCATCCACTGAGCTTGCTCTCCCTCA AG	CTGCTTTTTCTGGCGAGCCAAATTCCAAATCCTCCAGCACATATTCTCCAGCCTAGTATT CCTCTCCTGCGGACTCCGAGTAGCTTGTGC	TCGGATCCACGAACGATGCAAATCAGTCTCATCGAATCCAGTAATAACTTCCTCAACAAA GTACCTCGTCGGACTAAACCTCCCTCTTTCTCTCAACAACAACGATGACTTCTTATCATC TAGCCCTGGTCCTACATCCAGTATTGCCTCTAAGTAACTGTTAATCCAATCGTTTCCCGC CAT
‘-’strand	StSPS2	Soltu.DM.08G010240.1	CTACTCCTTAGAAAAACCAAGATTATTTAGCGCTACACTAATATCTTCCTTGCTGCAACT TCCACATTCAACAATGTTAGAATTCATGGCTGGCAAAACATGCTCAAGAGGGTAGTTCCT GTTTGAATGAACTTTAGAAGCATCACTGCAAACTCCATTTAACACCACAGTTTTATGTAC TCCTCCAACCAATAATTCATAATCCGTGTCTCCACTTTCTCCGGCAAAAACCACAAGATT TGACAAGTTTATGCCCCATCGAATGAACATGTAC	CTGAGTGCTTGTGATCTTGAAGCAAGAACAGGGATGACATTCAACCTGCTACCGCTTTGG CAATATATTGCATGGCATCTTAACGCCTGAATTCTCAGTAATCTCCTAACTTCCTTCACA GGAGGAAC	TAATGATTGATCATTTATTCTGAAAGAAAAGCAGTGTGCAGATGCTGAATCAATCTCCTT TATAGCTATCTCAGCTTTGTTTTTAACTTTGTCATTTAGAGAATCTGCCCAACGAATTAT AGTTTTCCTTAGGTCTTCTCCACCCCAACGATAATCAATGTGAGTTTGATAATCTGAATC CACAGTAAAAGAAGGCCCTGAACATTTCTCCTCAGAATTTAAACATGGATAATAAACTTC CCCACCACTATTGCAGATATAAGCATCAAAGTCGTGTGGTTTAAGCTTGGATAACTCCAA AAATGACTGCACCTCACTAATGGTCAAGGCTGTTGACAAGATAAAACCAATGGATGATGC CTTCTTGACAGTCTCAATAATTGTTTTGGTAAC…	CCGGTTAATGTCAACTGGACCACCATTTTTTGTGGCAACCATGGGAAGAGCATGAGCTGC TGC	CTCAATCAGAGTGAGTCCAAATGGTTCAATGAAAGCTGGATTGATGAAAACCCC	CTTTGACTTTGCAGCCAGACGATATATCTCAGGAACATCAGATTGCTTGTGATGCTTAGG ATACGCAACTTGACCATATAAATCATACTTGTCAATCAGTTTAATTATTGAAACAAGGAC AGATGAGTTTGTACTGGACATTTCATCAATTACATCACGATTTCCCATCACTAATGT	AAGGTTTGCGAGCTCTCTCAATTGTCGGCACTCTCCAAATGCCTTGACTAATGTGATTAA GTTTTTCTTTGGGTCAGGCCTTGCAAGAGCAAGTATCATAGGCTTGTGTGGATTGGTAAA GAAGCGCATGAT	CTCCAACCAAATGGGTGGATCTGCACTCCCAACATTATGTTCATTTCCTTCGACTTCTCC ATCCATGTCACCTTCGAGTGGAATAATATGATGAAATTCCATTCCTGGAGGAATCAC	CATTGCGCGAGGCATAAATCTGCCGTAGCAACTCACAGTGCGTTTCGTTCTTGCCCTGAG TTTGCGTTCTAACTTTGGATCAAATCCATCATAGAGATTCCATTGTTCTTCTATCTCCTG CCGTGTACTAGTAATTATCATCTCAGATACATCAAGAGATAACTCTTCAGCCTCTATGCG CCGCATTATTTTGTAAGTTGCATTTATCTCCTCTTTTGGTTGTCGTCCTTGCTTTAGTAG TTGTTCCAGCTTGTCTCGTCCAAGTGAATGGCCAGTCAAAACCATCGGTACATTTAAAGC CCCTGACAGAAGAGCAGCAGATTCACCGGCATCTGCATAGTGTCCATGGATAGCAACAGG CCAGAGTGGCTGCCCACTACCAGTTTGCTCTCC…	TTGGCCACCAGTGTCAGAATCCCGACCAAGCTCCATGTTTTCTCCCCTTATCAAGCCATG AAGA	ACAATGTAAAGTTTCTTTTCCATGTATTGATTAGCCCAATTTGCCATCGCATCCACAGAG CTGACCCTGGACATTCTTCCTCGGACACTATCACCATGAGTTGAGAGGTCACCAACAATG TCTATCTTTTCTCCATCTGATAAGTCTGACATGTCAACAGTTGTTTCTCTCCGTGCCCTT TCACGCTCACGATGCCTTTTCGCCACACGCTGAGCTTCTTCCCCTTCAAG	CTGTTTCTTCTTGCGAGTCAAATTCCAAATCCTCCAGCACATATTTTCCAATCTTGTATT CCTCTCCTGTGAATCCCGAATTGATGAAGC	GCGAACCCAAGAGCGATGAAGATCGGTTTCATCGAAGCCAGTGATGACTTCCTCAACAAA ATAACGAGCTGGACTGAAACGACCTCTTTCCCTTAACAAGAGAGAGGATTTTGGATCATT GATCGGGGGACCGACGTCCAGGATCGCCTCAAGGTAACTGTTTATCCATTCGTTTCCCGC CAT
‘-’strand	StSPS3	Soltu.DM.09G029230.1	TCATCTAGAGACTTGCCTCAATGCATTGGCAAACTCTTCAACTGTTTCGTTTCCACTGGT GAAGGTGATCAGTGGGCTCTCTGGTGGAACGACGTCTTCTCTTAGGTAGCTCCCTGATGT TCTTAGCAGATTTTCTGAACCTTCCTCGACAGCACCTTTCAAGATCAGTGTTTTGTGAGT TCCGGATATAAGTTCTTCATAATCTGTGTCTCCAGTTTCACCGAGGATGACACACATGTT TGCAACGTTCAATCTCCAGCGTACAAATAGATAC	CTGAGTGCCTGTGACCGAGACGCAAGCAGAGGAACAACTTGCATTCTTGTTGAATTCCTG CAATACATCAAATGGCAGCGAAGACCCCTCATCCTAAGCTTCTGTCTCATATCATCTACC TTCTTTGC	CTTACTGCGATCCTTGATCAAGTAGGAAATGCAATGGGAATTGCTTGATTTCACATCTTC CTCAATAGCACAAGTTACAGATTTCTCCTCTTTACCGTCTTGTGTATTCATTAATTTCCA AATTGTTTTCCTTAAGCCATCGCCACCCCATCGATATTCAATATGTGATGAATAGTCAGG GTCAGGATAAAGCTTTCCATGTTCTTCAGAACTAGTTCCCGGATAAAACACTTCGCTCCC ACTGCTACAGATTAAAGCATCAAATTCGGTTACTTTGATGTTCCCGGATTTTAGAAATGC TGCCAATTCGGACATCGACATTGCTGTTGAGATGGCAAATCCTGATACTCTTGCGACCTG TGGATCGGACTTAATGGTCTTAAGAATCTCCTG…	CCGATGAATATCGACTGGACCACCATTCTTAGTAGCCACCATAGGAAGTCCATGTGCAGA AGC	CTCAATTAGAGTCAGTCCAAAGGGTTCAACTAAAGCTGGATTTATGAAGACTCC	CTTCGTTTTGCCAGCGAGACGGTATATCTCTGGAACGTCACTTTGTTTGTGATGTTTTGG GAAAGCAACTTGGCCATAAAGGTCATACCTATCAACTAACTTCAGCACAGTTGTGAGAAC ACTAGCATTTCCTGCGGACATCTCATCTATGTCATCTCTATTTCCCATTATAAGTGT	CAGATTAGCGAGCTCCCTCAGCGGGCGACATTCTCCAAAAGCCTTCACGAGAGTGGTTAT GTTCTTCTTTGGGTCTGGTCTGGACAATGCAAGAATCATTGGCTTATGCGGGTTTGTTAG AAAACGCATGAC	CTCAGACCATATGGTGGGCACTGCTTTAGGAGATTGTCCATCAACATTAGTGAGTGCTGC AAGATCCCCATCAGCATCGGCTGTGTCCTCCTGATCCACAACATTACTGAAGTCCATTCC AGGAGGAATAAC	CGCCATCCTTGGCATGAAGCGACCATGGCAATTGACTCCTCGTCTTGCACGAGCTCTTAA AACTTTCTCAAGTTTTACATCGAATCCATCATATAGTCCCCATTGTTCATCAATCTCCTG TTTGGTGCTCGTGATAACGAGTTCTGCAGCATCCAGCGAGAGCTCCTCACCTTCAATCCT CCTCATGATCCTGTATGTGGAATTAATATCCTCTTTCGATTGCCTCGCTTGCTTGATAAG CTGTTCTAGCTTGTTTCTACCAAGTGAATGTCCTGTTAGGACCATCGGAACATTTAAAGC ACCTGAAAGGAGAGCAGCACTATCCCCTGCATCTGCATAATGACCATGGATTACATATGG CCAAACAGGTTGGCCTCCACCTATTTGTTCACC…	CTGACCACCTGTATCAGAATCACGACCAAGCTCCATATTTTCACCTCGGACCAATCCATG CAAA	CTAACTAGGATGATATAAAGCTTCTTTTCCTTGTTACTGTCTGACCACACTTCCAAATTG GAAAAGTTCCTCTGAAACCTTTTCCTCGGGCTGTCAAGTGTTGGTGTCTCCCCTAAAACA TCACCCTTTTCCCCTTCAGATAAGTCTTCTGACATGTCCTCTGTAACATCTTTGCGTCCT TGTTCTCGTTCCAATCTTCTGTTTGCAGACCTCTGGAGGTCTTCCCATTCCAA	CTGTTTCTTCTTGCGAGCAAGATGCCAAATGCGCCAACACATATTCTCCAATCTTGAACT TCTCTCCCTTGTATTCCTTGTAGCTACAACTTTTATCCATGTTCTATGAAGATCAGTTTC ATCAACCCCTGTAACAACTTCTTCAACAAAATATTTTGTTGGATTAAAATTAGCCCTTTC TGCCAAATTCAAATGTGATGATGTTGTTGTCGATGATGGTGTTTTATCCTCAATAGCTGA AGCTCCAGTGCTCAATATAGCTTCTAAATAACCATTTATCCATTCATTACCAGCCAT
‘-’strand	StSPS4	Soltu.DM.11G017190.1	TTACATGACCCCTAGCTTCTCCAAGGCTGCAGAGATATCCTGGGGTTCATATCCTTCAGC TGCACATATGTTTGTGCTCTCTAGAGGTACTATATCATCTGTGTTGAAGCTGTCTTCATT GTGAAGAAGCTTCTCGCTGGCATATTCCACACTTCGTTTCAGAATCACAGTCTTGTGAAG GCCCACAAGCAGGCCTTCATAGTCTGTATCTCCCTTTTCCCCCACAAAAACAACCACACT GGAAAGATCAACTCCCCATCTAACTGAGAGATAC	CTAAGTGCTTGGGATCTCGATGCAAATAACGGTGTCACGTTCAACCTTGATGCAGCATGT GTGTAGACAACATTGCAACGGAAGCCTCTCATGCGGAGCCTCTGACGAAGGTCATTAACT TTCCTTAC	TCCGGCTCCTGGCTTGATGCTATATGAGTAGCATTGAAAGCTAGATGCACTAGGGCATTG TGCAATGTCATGCTCAGAACCTTCTTCGATTTTACCAAGCCTCATCACTGCTGATTTAAT GTTCTCACCTGGCCACCGGTACTCAATGTGGGCTTCATAGTCGTCATCTAGTCCTAAGTC CTTCCATGGGTAGTATATTTCACTTCCACTGCTGCAAATCAATGCATCAAAATCTTCTAA ATTTGTTGGGCAGCTGTTTACCACTTCTTTAGTCTCTTGCAGACTCAAGCCTGTCAGAAA AACTAAACCTATTTGGCTGGACCTGGATCTTGCAACTTGCATTATATTCTTGACCGTTAG AGATAAGGTCTCAGTAGGAGATCCGTTGCTGTT…	CTTGAGTATATCTACTGGCCCTCCATTTTTCGTAGCAACTATCGGCAAACCATAAGCAGC TGC	CTCAATAAGAGTGAGGCCAAAAGGCTCAACAAGAGCTGGATTGATGAACACTCC	CTTAGTTTTTGCAGCCAGGCGATATATATCAGGAACCTCTGGTTGCTTATGATGCTTTGG ATATGCCACCTGGCCATACAAATTGTACTTGTCAATGAGCTTTATTACTGTTGTGAGTAC TGCAGAGCTGCTACTGGACATGTCATCAATGTCATCTCTGTTACCTAGGATCAGAGT	TAAGTTGGCTAGTTCTCGAAGTGCTTGACATTCTCCAAAAGCCCTGAGCAAAGTAGTTAC ATTCTTCTTAGGATCTGGACGTGACAGTGCAAGTATCATTGGCTTGTGAGGGTTAACGAA GAATCGCATGAT	CTCAGACCATATATGTGGTATAGGTCTCTTTTGACTTTTGTCTGCACCAATCAATGACTT GAGATCTCCATCTCCTTCCAGTGAATCTTTTGCGTTCATGTTACTGAAGTCCATCCCCGG CGGTATAAC	CACCATCCTCGGCATGTATCTCCCGAGGCAACTCACTCCTCTCCGTCTCCTAACTCTGAG TTTCCTTTCCAGCTGAATATCAAAACCATCATACAAACCCCATTGTTCATCAATCTCTTG TCTTGTGCTAGTTATCACCATTTCAGCAGTATCTAGTCCCAACTCTTCTGCTTCTATTCT CCTCATTATCTTGTAGGTGGTATTGATGTCCCCCTTAGTGAGTCTCCCCTGTTTAAGCAA TTGCTCAAACTTGTTTCTTCCTAGTGAGTGTCCTGTTAACACCATTGGTACGTTTAAGGT TCCAGATAAGCGGGCTGCTACCTCTCCTGCATCAGCATAGTGCCCATGAATTACATAAGG CCACACTGCTTTTCCAGCATTGACTTGCTCCCC…	TTGTCACCTGGTCCGCAGGGGATCCGAATTATGTAGGCACCACAGCAGCCAAAAGCATCA GATGGGCATGAGAGCATCTCAATTGGCTCACCATAGCTAGAATCAACCTCTGGGGATGTG ATCTGCCGAGTCAAGAGATCAACTCGGTGAACTCCTTTCATGTTTGCAAGTGCTCGAGCA AGCTCTACTACATACTTCAC	CTGACCACCAGTGTCTGAATCTCGTCCAAGTTCCATGTTTTCTCCACGCACCAACCCATG GATACTACAAAAAAACAGTAAACATAGCATAAAACTTGTTTGACCAATGTTTGATGCCAT
			0.667	0.7305	65.79	83.73	89.81	82.34	83.52	67.23	0.7418	0.2438	0.6147	0.2604	0.7432
			High similarity with high coverage in all the StSPS genes								With about 70% coverage of StSPS4 for other genes	With about 30% coverage of StSPS1/2/3 for other genes	With about 50% coverage of StSPS4 for other genes	With about 30% coverage of StSPS1/2 for other genes	100% coverage
