# Supplementary material
Source: MDPI journal article supplement (https://www.mdpi.com/2311-7524/9/4/511)
Supplement: s1 [file s1 › Supplementary file 2.pdf]

## Supplementary file 2

### The protein sequences used for phylogenetic analysis in this paper

>TaSPS1

MAVGNEWINGYLEAILDAGSKLRVQGVSLPPLEPAPALASEESSAAYNPTRYFVEEVVRS  
FDDQALHKTWTKVVMAMRNSQERNNRLENLCWRIWNVARQKKQVERDYSQEVARRKQEQL  
GSLEAAEDLSESEGEKETVPKPDGAAAHLSADEQQPQQRTRLARINSEVRLVSDDEDEQ  
SKDRNLYIVLVSIHGLVRGENMELGRDSDTGGQVKYVVELARALAATAGVHRVDLLTRQI  
SCPDVDWTYGEPEMLERLSSGDDDDGESGGGAYIVRLPCGPRDQYIPKEELWPHIPEF  
VDRALSHVTNVARALGEQLQPPPSDAPATALAAPVWPYVIHGHYADAAEVAANLASALNV  
PMVMTGHSLSGRNKLEQLLKLGRMHGPEIQGTYKIARRIEAETGLDTAEMVVTSTKQEIE  
EQWGLYDGFDMVERKLVRQRRGVSSLGRYMPRMAVIPPMDFSFVDTQDTADGDGADL  
QMLIDPVKAKKALPPIWSEILRFFTNPHKPMILALSRDPKKNITLLKAYGESRKLREL  
ANLTLILGNRDDIDDMAGGGGTVLTAVLKLIDRYDLYGQVAYPKHHKQTDVPHIYRLAAK  
TKGVFINPALVEPFGLTIIIEAAAYGLPVVATKNGGPVDILKALHNGLLVDPHSAEAITGA  
LLSLLADKGQWLESRRNGLRNIHRFSWPHHCRILYSHVAAYCDHPSPHQRLRVPGVPAAS  
ASMGGDDSLSDSLRGLSLQISVDASSDLNAGDSAALIMDALRRRPAADRREGSGRALGFA  
PGRRQSLLVAVDCYCDGKPDVEQLKKAIDAAMSAGDGAGGRQGYVLSTGMTIPEAAET  
LKACGADPAGFDALICSSGAEICYPWKELTADEEYSGHVAFRWPGDHVKTVPRLGKAED  
AQASDLAVDVSAGSVHCHAYAATDASKVKKVDSIRQALMRGFRCNLVYTRACTRLNVIP  
LSASRPRLRYLSIQWIDLAKVAVLVGETGDTREKLLPGLHRTLILPGMVSRGSEQLV  
RGEDGYATQDVVAMDSPNIVTLAQGQAVSDLLKAM

>TaSPS2

MAGNDWINSYLEAILDAGGAAGDITAASVASAAPGGGAGSAAAEKRRDKASLMLLERGRF  
NPARYFVEEVISGFDETDLYKTWVRTSAMRSPQERNTRLENMSWRIWNLARKKKQIEGEE  
ASRSSKKRLEREKARRDAAADLSEDLSDGEKGEHINESSIHAESTRGHMPRIGSTDAIDV  
WANQHKKKLYIVLVSIHGLIRGENMELGRDSDTGGQVKYVVELARALGETPGVYRVDLL  
TRQISAPDWDWSYGEPTMLSPRNSENLGDDMGESSGAYIVRIPFGPREKYPKEQLWPH  
IQEFVDGALVHIMQMSKVLGEQVNGQPVPVWPVIHGHYADAGDSAALLSGALNVPMVFTG  
HSLGRDKLEQLLKQGRQTRDEVNATYKIMRRIEAEELCLDASEIVITSTRQEIDKQWGLY  
NGFDVIMERKLRLARIKRGVSCYGREMPRMVPIPPGMEFSHIVPHDVLDSSEANEVGSDES  
PDPPVWADIMRFFSNPRKPMILALARPDPKKNITTLVKAFGEHHELRNLANLTLIMGNRD  
VIDEMSSTNGAVLTSVLKLIDKYDLYGQVAYPKHHKQSEVPDIYRLAARTKGVFINCAYI  
EPFGLTIIIEAAAYGLPMVATQNGGPVDIHRVLDNGILVDPHNQNDIAEALYRLVSDKQLW  
AKCRQNGLDNIHRFSWPEHCKNYLSRVGTLKSRHPRWQKSDDATEVSETDSRGDSLTDIH  
DISLNLKISLSEKSGSMSKYGRSSTSDDRNLEDAVQKFSEAVSAGTKDESGEKAGATTG  
SNKWPSLRRRHIVVIAVDSVQDADLVQIIKNIFQASNKEKSSGALGFLVSTSRASEIH  
PLLTSGGIEITDFDAFICSSGSDLCYPSSNSEDMLSPAELPFMIDL DYHSQIQYRWGGEG  
LRKTLIRWAAEKNSESGKEAVVEDDECSSTYCISFKVNTEAVPPVKDLRKTMRIQALRC  
HVLVSHDGSKLNIFPLASRSQALRYLYIRWGVLSNMTVVVGESGTDYEGLLGGVQKT  
IILKGSFNSAPNQLHAARNYSLEDVVSFDPKPGIASVDGYAPDILKSALQQFGALQG

>TaSPS3

MVGNDNWINSYLDAILDAGKSAVGGDRPSLLLRERGHFSPARYFVEEVITGYDETDLYKT

WLRANAMRSPQERNTRLENMTWRIWNLARKKKELEKEEACRLLKRHPETEKTRIDATADM  
SEDLFEGEKGEDAGDPSVAYGDSTTGVSPKTSSVDKLYIVLISLHGLVRGENMELGRDSD  
TGGQVKYVVEFAKALSSSPGVYRVDLLTRQILAPNFRDSYGEPAMLVSTTFKNSKQKEG  
ENSGGYIIRIPFGPRDMYLTKERLWPFIQEFVDGALSHIVRMSKTIGEEIGCGHPVWPAV  
IHGHYASAGIAATLLSGALNLPMAFTGHFLGDKDKLEGLLKQGRQSREEINMTYKIMRRIE  
AEELSLDASEIIVIASTRQEIEEQWNLVDGFEVILARKLRARVKGANCYGRYMPRMVPIIP  
PGVEFGHIIHDFDIDGEEENHGPASEDPPIWSQLMRFFTNPRKPMILAVARPYPEKNITT  
LVKAFGECRPLRELANLTLIMGNREAIKMHNTSASVLTSLTIDEYDLYGQVAYPKHH  
KHSEVPDIYCLATRTKGAFVNVAYFEQFGVTLIEAAMNGLPVIATKNGAPVEIHQVLNNG  
LLVDPHDQNAIADALYKLLSEKQLWSRCRENGLNKNIHQFSWPEHCKNHSRILTGMRSR  
AVGSEEEKSAPISGRKHIIVISVDSVNKENLVRIIRNAIEAAHTENTPASTGFVLSTSL  
TISEICSLLSVGMHPAGFDAFICNSGSSIIYPSYSGNTPSNSKVTHVIDRHHQSHIEYR  
WGGEGRLRKYLVKWATSVVERKGRIERQMIFEDSEHSSTYCLAFKVVNPNHLPPLKELRKL  
MRIQSLRCNALYNHSATRLSVTPIHASRSQAIRYLFVRWGIELPNIVVMVGESGDSYEE  
LLGGLHRTIILKGDFNIAANRIHTVRRYPLQDVVALDSSNIEVQGCTTEDIKSALRQIG  
VPTQ

>TaSPS4

ENLELGRSDTSGQVKYVVELAKALSSCPGVYRVDLLTRQILAPNYDRGYGEPSETLVPT  
SFKNLKQERGENSGAYITRIPFGPKDKYLAKHEHLWYPVQEFVDGALSHIVHMSKIIGEEI  
GCGHPMWPAVIHGHYASAGVAAALISGALNVHVMVFTGHFLGDKDKLEGLLKQGRQTREEIN  
MTYKIMRRIEAEELSLDASEIIVIASTRQEIEEQWNLVDGFEVMLARKLRARVKGANCYGR  
RYMPRMVPIIPPGVEFGHMIHEFDMEGEEDSHSPASEDPPIWSEIMRFFTNPRKPLILAVA  
RPYPEKNITTLVKAFGECRPLRELANLTLIMGNREAIKMSNMSAAVLTSLTIDEYDL  
YGQVAYPKHHKHSEVLDIYRLAARTKGAFVNVAYFEQFGVTLIEAAMHGLPVIATKNGAP  
VEIHQVLNGLLVDPHDQHAIAADALYKLLSDKQLWSRCRENGLNKNIHRSWPEHCKNYLS  
RILTSPRYPSFSPSNEDQFKAPIKGRKCIIVIAVDSASKKDLVCIKNSIEATRKETLSG  
STGFVLSTSLTMEIHSLLISAGMAPTDFDAFICNSGSDLFYPSRAGDSPSTSRVTFSLD  
RNYQSHIEYRWGGEGRLRKYLVKWASSIVERRGRTEKQVIFEDAEHSSTSCLAFRVVPNPY  
LPPLKELQKLMRIQSLRCHALYNHSATRLSVIPIHASRSQALRYLSVRWGIELRNVLV  
GESGDSYEEELFGGLHKTIVLKGFNTPANRIHTVRRYPLQDVIALDCSNIIIGVEGCSAD  
DLTPTLKALGIPTK

>TaSPS5

MAGNEWINGYLEAILDSGASGGGGGGGGSGAGAGGGGGGGGGDPKSSSSPRGPHTIF  
NPTTYFVEEVVKGVDES DLHRTWIKVVATRNRARERSSRLNMCWRIWHLARKKKQLEIE  
GIQRMSARQNEQEKRREATEDLSEDLDEGEKGDIVGELMPSGTPKKKFQRNFSDLVW  
SDENKEKKLYIVLISVHGLVRGENMELGSDSDTGGQVKYVVELARALAMMPGVYRVDLF  
TRQVSPDWDWSYGEPTTEMLTSGSHDAEGSGESGGAYIVRIPCGQS NKYIKKESLWPYL  
QEFVDGALAHILNMSKVLGEQVGHGKPVLPYVIHGHYADAGDVAALLSGALNVPMVLTG  
HSLGRNKLEQIMMQGRMSKEEDATYKIMRRIEGEELALDAAELVITSTRQEIDEQWGL  
YDGFVDKLEKVLRARARRGVSCHGRFMPRMVVIIPGMDFSNVVVPEDTSDGDDKDDINL  
DGASPRSLPPIWAEVMRFLTNP HKPMILASRPDXKKNITTLVKAFGECRPLRELANLV  
LIMGNRDDIEEMPPGNANVLTVLKLVDKYDLYGSVAFPKHHKQADVPEIYRLTAKTKG

>OsSPS1

>OsSPS2

MAGNDNWINSYLAIDLAGKAAIGGDRGSLLLRERGHFSPARYFVEEVITGYDETDLTKT  
WLRANAMRSPQERNTRLENMTWRIWNLARKKKFEKEEEACRLLKRQPEAEKLRTDTNADM  
SEDLFEGEKGEDAGDPSVAYGDSTTGSSPKTSSIDKLYIVLISLHGLVRGENMELGRDSD  
TGGQVKYVVELAKALSSSPGVYRVDLLTRQILAPNFDRSYGEPTEMLVSTSFKNSKQEK  
ENSGAYIIRIPFGPKDKYLAKEHLWPFIQEFVDGALGHIVRMSKTIGEEIGCGHPVWPAV  
IHGHYASAGIAAALLSGSLNIPMAFTGHFLGDKDKLEGLLKQGRHSREQINMTYKIMCRIE  
AEELSLDASEIVIASTRQIEEQWNLYDGFEVILARKLRARVKGANCYGRYMPRMVIIIP  
PGVEFGHIIHDFEMDGEENPCPASEDPPIWSQIMRFFTNPRKPMILAVARPYPEKNITS  
LVKAFGECRPLRELANLTLIMGNREAIKMNMSAAVLTSVLTIDEYDLYGQVAYPKHH  
KHSEVPDIYRLAARTKGAFFVNVAYFEQFGVTLIEAAMNGLPIIATKNAPVEINQVLNNG  
LLVDPHDQNAIADALYKLLSDKLWSRCRENGLKNIHQFSWPEHCKNYLSRILTLGPRSP  
AIGGKQEQKAPISGRKHIIVISVDSVNKEDLVRIIRNTIEVTHTEKLSGSTGFVLSTSLT  
ISEIRSLVSAGMLPTVFDAFICNSGSNIYYPLSYGDTSPSSQVTPAIDQNHQAHIEYRW  
GGEGLRKYLVKWATSVVERKGRIERQIIFEDPEHSSTYCLAFRVNVNPNHLPPLKELRKL  
RIQSLRCNALYNHSATRLSVVPIHASRSQALRYLCIRWGIELPNVAVLVGESGDSDEEEL

LGGLHRTVILKGEFNIPANRIHTVRRYPLQDVVALDSSNIIGIEGYSTDDMKALQQIGV  
LTQ

>OsSPS6

MYGNDNWINSYLDAILDAGKGAASASASAVGGGGGAGDRPSLLLRERGHFSPARYFVEE  
VITGYDETDLYKTWLRANAMRSPQEKNTRLENMTWRIWNLARKKKKEKEEANRLKKRRL  
ETERPRVETSDMSEDLFEGEKGEDAGDPSVAYGDSTTGNTPRISSVDKLYIVLISLHGL  
VRGENMELGRDSDTGGQVKYVVELAKALSSCPGVYRVDLFRQILAPNFDRSYGEPVEPL  
ASTSFKNFKQERGENSGAYIIRIPFGPKDKYLAKEHLWPFIQEFVDGALSHIVKMSRAIG  
EEISCGHPAWPAVIHGHYASAGVAAALLSGALNVPVMVFTGHFLGDKLEELLKQGRQTRE  
QINMTYKIMCRIEAEELALDASEIVIASTRQEIEEQWNLVDGFEVILARKLRARVIRGAN  
CYGRYMPRMVIIPPGVEFGHMIHDFMDGEEDGPPASEDPSIWSEIMRFFTNPRKPMIL  
AVARPYEKNITTLVKAFGECRPLRELANTLIMGNREAIKMHNMMSAAVLTSLVTLIDE  
YDLYGQVAYPKRHHKSEVPDIYRLAVRTKGAFVNVYPYFEQFGVTLIEAAMHGLPVIATKN  
GAPVEIHQVLDNGLLVDPHDQHAIDALYKLLSEKQLWSKRENGLNKNIHQFSWPEHCKN  
YLSRISTLGRPHPAFASNEIDRIKAPIKGRKHVTIAVDSVSKEDLIRIVRNSIEAARKEN  
LSGSTGFVLSTSLTIGIEHSLMSAGMLPTDFDAFICNSGSDLYPSCGTGTPSNSRVTF  
ALDRSYQSHIEYHWGGEGRLRYLVKASSVVERRGRIEKQVIFEDPEHSSTYCLAFKVVN  
PNHLPPLKELQKLMRIQSLRCHALYNHGATRLSVIPIHASRSKALRYLSVRWGIELQNVV  
VLVGETGDSYEEFLGGLHKTIVLKGEFNISANRIHSVRRYPLQDVVALDSPNIIGIEGY  
GTDDMRSALKQLDIRAQ

>OsSPS8

MAGNDWINSYLEAILDAGGAAGEISAAAGGGGDGAAATGEKRDKSSMLRERGRFSPARY  
FVEEVISGFDETDLYKTWVRTAAMRSPQERNTRLENMSWRIWNLARKKKQIEGEEASRLA  
KQRLEREKARYAAADMSEDLSEGEKGENINESSTHDESTRGRMPRIGSTDAIEAWASQ  
HKDKKLYIVLISIHGIRGENMELGRDSDTGGQVKYVVELARALGSTPGVYRVDLVTRQI  
SAPDVDWSYGEPTMLSPRNSENFHDMGESSGAYIVRIPFGPRDKYIPKEHLWPHIQEF  
VDGALVHIMQMSKVLGEQVGSQQLVWPVVIHGHYADAGDSAALLSGALNVPIMFTGHSLG  
RDKLEQLLKQGRQTRDEINTIYKIMRRIEAEELCLDASEIIITSTRQEIEQQWGLYDGF  
LTMARKLRARIKRGVSCYGRYMPRMIAVPPGMEFSHIVPHDQDGEANEDGSGSTDP  
IWADIMRFFSNPRKPMILALARPDPKKNITTLVKAFGEHRELRLANLTLIMGNRDVIDE  
MSSTNSAVLTSILKLIDKYDLYGQVAYPKHHKQSEVPDIYLAARTKGVFINCAFIEPFG  
LTLIEAAAAGLPMVATRNGGPVDIHRVLDNGILVDPHNQNEIAEALYKLVSDKQLWAQCR  
QNGLNKNIHQFSWPEHCKNYSRVGTLKPRHPRWQKSDDATEVSEADSPGDSLRDVHDISL  
NLKLSLDEKSSTKENSVRNLEDAVQKLSRGVSANRKTESVENMEATTGNKWPSLRRRK  
HIVVIAIDSVQDANLVEIKNIFVASSNERLSGSVGFVLSTSRASEVHSLTSGGIEAT  
DFDAFICNSGSDLCYPPSNSDMLSPAELPFMIDLDYHTQIEYRWGGEGRLKTLIRWAAE  
KSEGGQVVLVEDEECSTYICISFRVKNAEAVPPVKELRKTMRIQALRCHVLYSHDGSKLN  
VIPVLASRSQALRYLYIRWGVLSNMTVVVGESGDTDYEGLLGGVHKTIILKGSFNAV  
QVHAARSYSLQDVISFDKPGITSIEGYSPDNLSALQQFGILKDNV

>OsSPS11

MAVGNEWINGYLEAILDAGVKLREQRGAAAVQLPPLLPAPEDAASAVATAATYSPTRYFV

EEVVS RFDDRLHKTWTKV VAMRNSQERNNRLENLCWRIWNVARRKKQVEW EFSRQLSRR  
RLEQELGSREAAADLSESEGEKDGKPDTHPPPPAAAAA EAAADDGGGGDHQQQ QPPPP  
HQLSRFARINSDPRIVSDEEEVTTDRNLYIVLISIHGLVRGENMELGRDSDTGGQVKYA  
VELARALAATPGVHRVDLLTRQISCPDVDWTYGEPVEMLTPAADADDEDGGGGSSGGAY  
IVRLPCGPRDKYLPKESLWPHIPEFVDRALAHVTNVARALGEQLSPPPSDGAGAAAQAV  
WPYVIHGHYADAAEVAALLASALNVPMVMTGHS LGRNKLEQLLKLGRMPRAEIQGTYKIA  
RRIEAEETGLDAADMVVTSTKQEIEEQWGLYDGF DLKVERKLRVRRRGVSCLGRYMPRM  
VVIPPGMDFSYVDTQDLAGDGAGGAGDAADLQLLINPNKAKKPLPIWSEVLRFFTNPHK  
PMILALSRDPKKNVTLLKAYGESRHLRELANTLILGNRDDIEEMSGGAATVLTAVLK  
LIDRYDLYGQVAYPKHHKQTDVPHIYRLAAKTG VFINPALVEPFGLTIEAAAYGLPVV  
ATKNGGPVDILKVLNSGLLVDPHDAAAITAALLS LADKSRWSECRRSGLRNIHRFSWPH  
HCRLYLSHVAASCDHPAPHQLLRVPPSPSSSSA SAAAAGGGGAAASSEPLSDSLRDLSLR  
ISVDAASPDLSAGDSAAAILDALRRRRSTDRPA ASSAARAIGFAPGRRQSLLVAVDCYG  
DDGKPNVEQLKKVVELAMSAGDGDDAGGRGYV LSTGMTIPEAVDALRACGADPAGFDALI  
CSSGAEICYPWKGEQLAADEEYAGHVAFRWPGD HVRSAVPRLGKADGAQEADLAVDAAAC  
SVHCHAYAAKDASKVKKVDWIRQALMRGFR CNLVYTRACTRLNVVPLSASRPRALRYLS  
IQWIDLSKVAVLVGEKGDTRERLLPGLHRTV ILPGMVAAAGSEELLRDEDGFTTEDVVA  
MDSPNIVTLADGQDIAAAAADLLKAI

>StSPS1

MAGNDWINSYLEAILDVGPGLDDKKSSLLLRERGRFSPTRYFVEEVITGFDETLHRSWI  
RAQATRSPQERNTRLENMCWRIWNLARQKKQLEGEQAQWMAKRRQERERGRREAVADMSE  
DLSEGEKGDIVADMSSHGESTRGRLPRISSVETMEAWVSQQRGKKLYIVLISLHGLIRGE  
NMELGRDSDTGGQVKYVVELARALGSM PGVYRVDLLTRQVSSPEVDWSYGEPTMLTPIS  
TDGLMTEMGESSGAYIIRIPFGPREKIYIPEQLWPYIPEFVDGALNHIIQMSKVLGEQIG  
SGYPVWPVAIHGHYADAGDSAALLSGALNV PMLFTGHS LGRDKLEQLLRQGRLSKDEINS  
TYKIMRRIEAEELTDASEIVITSTRQEIDEQWR LYDGFDPILERKLRARIKRNVSCYGR  
FMPRM AVIPPGMEFHIVPHEGDMDGETEGSEDGKTPDPPIWAEIMRFFSNPRKPMILAL  
ARPDPKKNLTTLVKAFGECPRLRELANTLIMGNRDNIDEMSSTNSALLSILKMIDKYD  
LYGQVAYPKHHKQSDVPDIYRLAAKTG VFINPAFIEPFGLTIEAAAYGLPMVATKNGG  
PVDIHRVLDNGLLVDPHDQQAIDALLKLVADKQLWAKCRANGLKNIHLFSWPEHCKTYL  
SRIASCKPRQPRWLRSDDDDENSETDSPSDSLRDIHDISLNLRFSLDGEKNDNKENADN  
TLDPEVRRSKLENVLSLSKGALKSTSKSWSSDKADQNP GAGKFPAIRRRRHIFVIAVDS  
DASSGLSGSVKKIFEAVEKERAEGSIGFILATSFNISEVQS FLLSEGMNPTDFDAYICNS  
GGDLYSSFHSEQNPFVVDLYYHSHIEYRWGG EGLRKTIVRWAASIIDKNGENGDHIVVE  
DEDNSADYCYTFKVCKPGTVPPAKELRKVMRIQALRCHAVYCN GSRINVIPVLASRSQA  
LRYLYLRWGMDSLKLVFVGESGDTDYEGLIGLRKAVIMKGLCTNASSLIHG NRNYPLS  
DVLFPDSPNVIQADEECSSTEIRSLVLAVLKG

>StSPS2

MAGNEWINSYLEAILDVGPPINDPKSSLLLRERGRFSPARYFVEEVITGFDETLHRSWV  
RASSIRDSQERNTRLENMCWRIWNLTRKKKQLEGE EAQRVAKRHRERERARRETTVDMSD  
LSDGEKIDIVGDLSTHGDSVRGRMSRVSSVDAMANWANQYMEKKLYIVLHGLIRGENMEL  
GRDSDTGGQVKYVVELARALGMMPGVYRVDLLTRQVSAPDVDWTYGEPTEMINLTDSLDA  
MPEVGESGGAYIIRIPFGPKDKYIPKELLWPHIPEFVDGALSHIVQMSKVLGEQTGSGQP

LWPVAIHGHYADAGESAALLSGALNVPMLTGHSLGRDKLEQLLKQGRQPKEEINATYKI  
MRRIEAEELSLDVSEMIITSTRQEIEEQWNLYDGFDPKLERKLRARTKRTVSCYGRFMPR  
AMVIPPGMFEFHIIPLGDMGDGEVEGNEHNVGSADPPIWLEIMRFFTNPHKPMILALARP  
DPKKNLITLVKAFGECRQLRELANLTLVMGNRDVIDEMSSTNSSVLVSIIKLIDKYDLYG  
QVAYPKHHKQSDVPEIYRLAAKSKGVFINPAFIEPFGLTLIEAAHALPMVATKNGGPVD  
INRVLNGLLVDPHDQHSVADALLKLVDKQLWACRDSGLRNIHLFSWPEHCKTYLSRV  
MSCKQRQPKWKRNEDECSDEPDSPEDSLRLDIKDLSSLKSLDGDKNEKSGTSVTALDF  
VENATKKKSQLDNMVSTLPVSKSMEKAEQSKFQLSRRRKLVIAADCCTPAGLADVTKI  
IETVKKASSIGFILSTALTISEVQSFELESLKPHDFDAYICNSGGEVYYPCLNSEEKCS  
GPSFTVDSQYQTHIDYRWGGEDLRKTIIRWADSLNDKVKNKAEIAIKEIDSASAHCFEFR  
INDQSLVPPVKEVRRLLRIQALRCHAIYCQSGSRLNVIPVLASRSQALRYMFIRWGINLS  
NLVVFAGESGDTDYELLVGGVHKTVVLNGVCSDASKVHSNRNYPLEHVLPAAMNSNIVECG  
SCSKEDISVALNNLGFKE

>StSPS3

MAGNEWINGYLEAILSTGASAIEDKTPSSTTTSSHLNLAERANFNPTKYFVEEVVTGVDE  
TDLHRTWIKVVATRNRTRERSSRLNMCWRIWHLARKKKQLEWEDLQRSANRRLEREQGRK  
DVTEDMSEDLSEGEKGDVLGETPTLDSPRKRFQRNFSNLEVWSDSNKEKKLYIILVSLHG  
LVRGENMELGRSDTGGQIKYVVELAKALAKMPGVYRVDLFTRQIASTEVDWSYGEPTEM  
LNTGPEDGDDTDLGESSGAYIIRIPFGPRDKYLRKELLWPHIQEFVDGALAHIIINMSKAL  
GEQIGGGQPVWPYVIHGHYADAGDSAALLSGALNVPMLTGHSLGRNKLEQLIKQARQSK  
EDINSTYRIMRRIEGEELSLDAAELVITSTKQEIDEQWGLYDGFVKLEKVLRARARRGV  
NCHGRFMPRMAVIPPGMDFSNVVDQEDTADADGDLAALTNDVGQSPKAVPTIWSEVMRFL  
TNPHKPMILALSRPDPKKNITTLVKAFGECRPLRELANLTLIMGNRDDIDEMSAGNASVL  
TTVLKLVDYDLYGQVAFPKHHKQSDVPEIYRLAGKTGKGVFINPALVEPFGLTLIEASAH  
GLPMVATKNGGPVDIHRALNGLLVDPHDQQAISDALLKLVDSEKNLWHECRKNGWKNIHL  
FSWPEHCRTYLTRIAACRMHPQWKTNDNPSDELAEESSLNDSLKDQVQDMSLRSLSDGEK  
TSLNESFDASATADAVQDQVNRVLSKMKRPETSKQESEGDKDNVPSKYPIRLRRRKLIV  
IALDCYDTNGAPQKKMIQIQEILKTIKSDPQVARVSGFAISTAMSMSELAFLKSGNIK  
VTEFDALICSSGSEVFYPGTSSEEHGKLYPDYSSHIEYRWGGDGLRKTWKLMTQDG  
KEEKSVTCAIEEDVKSSNSHCISYLIKDRSKAKKVDDMRQKLRMRLRCHLMYCRNSTRM  
QVVPLLASRSQALRYLFVRWRNLVANMCVILGETGDTDYEELISGTHKTLILKGAVEEGS  
ENLLRTSGSYLREDVVPESPLITFTSGNETVEEFANALRQVSR

>StSPS4

MASNIGQTSFMLCLLFFCSIHGLVRGENMELGRSDTGGQVKYVVELARALANMKGVHRV  
DLLTRQITSPEVDSSYGEPIMLSCPSDAFGCCGAYIIRIPCGPGDKYIPKESLWPYIPE  
FVDGALSHIVNMARAIGEQVNAGKAVWPYVIHGHYADAGEVAARLSGTLNVPMLTGHSL  
GRNKFEQLLKQGRLTGKDINTTYKIMRRIEAEELGLDTAEMVITSTRQEIDEQWGLYDGF  
DIQLERKLVRRRRGVSLGRYMPRMVIPPGMDFSNMNAKDSLEGDGLKSLIGADKSQ  
KRPIPHIWSEIMRFFVNPHKPMILALSRPDPKKNVTLLRAFGECQALRELANTLILGN  
RDDIDDMSSSSAVLTTVIKLIDKYNLYGQVAYPKHHKQPEVPDIYRLAAKTKGVFINPA  
LVEPFGLTLIEAAAYGLPIVATKNGGPVDILKALNGLLIDPHDQKAIEDALLKLVDKN  
LWLECRKNGLKNIHRFSWPEHCRNYLSHVQHCRNRHPANCLEVMKPAPEEPMSESIRDVE  
DLSLKFSIDVDFKANGELDMARRQHELVEILSRKANSISKPIVSYSPPRRQVLYVVATDC  
YNSNGSPTETLSLTVKNIMQVARSRSSQIGLVFLTGLSLQETKEVNSCPTNLEDFDALI

CSSGSEIYYPWKDLGLDDDYEAHIEYRWPGENIKSAVMRLGKIEEGSEHDIAQCPSASSF  
QCYSYSIKPGAGVRKVNDLRQRLRMGRFCNVVYTHAASRLNVTPLFASRSQALRYLSVR  
WGVDLSSVVVFVGEKGD TDYEGLLVGLHKT VILKRSVEYASEKLLHNEDSFNTDDIVPLE  
STNICAAEGYEPQDISAALEKLGVM

>AtSPS1

MAGNEWINGYLEAILDSQAQGIETQQKPQASVNLREGDGQYFNPTKYFVEEVTVGVD ETLHRTWLKV  
ATRSRERNRLENMCWRIWHLTRKKKQLEWEDSQRIANRRLEREQRRDATEDLSEDLSEGEKGDGLGE  
IVQPETPRRQLQRNLSNLEIWSDDKKENRLYVVLISLHGLVRGENMELGSDSDTGGQVKYVVELARALAR  
MPGVYRVDLFRQICSSEVDWSYAEPTMLTTAEDCDGDETGESSGAYIIRIPFGPRDKYLNKEILWPFV  
QEFVDGALAHILNMSKVLGEQIGKGKPVWPYVIHGHYADAGDSAALLSGALNVPMLTGHSLGRNKLEQL  
LKQGRQSKEDINSTYKIKRRIEAEELSDAAELVITSTRQEIDEQWGLYDGFVKLEKVLRARARRGVNC  
HGRFMPRMAVIPPMDFTNVEVQEDTPEGDGD LASLVGGTEGSSPKAVPTIWSEVMRFFTNPHKPMILAL  
SRPDPKKNITLLKAFGECPRLRELANLVTTLIMGNRDDIDELSSGNASVLTTLVKLIDKYDLYGSVAYP  
KHHKQSDVPDIYRLAANTKGVFINPALVEPFGLTIEAAAHGLPMVATKNGGPVDIHRALHNGLLVDPHD  
QEAIANALLKLVSEKNLWHECRINGWKNIHLSWPEHCRTYLTRIAACRMRHPQWQTDADEVAAQDDEFS  
LNDSLKDQVQDMSLRSLMDGDKPSLNGSLEPNSADPVKQIMSRMRTPEIKSKPELQGGKQSDNLGSKYPVL  
RRRERLVVLAVDCYDNEGAPDEKAMVPMIQNIIAVRSDPQMAKNSGFAISTSMPLDELTRFLKSAKIQV  
SEFDTLICSSGSEVYYPGGEEGLLPDPDYSSHIDYRWGMEGLKNTVWKLMTTAVGGGEARNKGSPSLIQ  
EDQASSNSHCVAYMIKDRSKVMRVDDLQRLRLRGLRCHPMYCRNSTRMQIVPLLASRSQALRYLFVRWR  
LNVANMYVVVGDRGDTDYEELISGTHKTIVIVKGLVTLGSDALLRSTD LRDDIVPSES PFIFLKVDS PVK  
EITDIFKQLSKATA

>AtSPS4

MARNWDWINSYLEAILDVGTSKKKRFESNSKIVQKLGDI NSKHQEKVFGDMNGKDHQEKVFSPIKYFVEE  
VVNSFDES DLYKTWIKVIATRNTRERSNRLENICWRIWHLARKKKQIVWDDGVRLSKRRIEREQGRNDAE  
EDLLSELSEGEKDKNDGEKEKSEVTTLEPPRDHMPRISEMQIWSEDDKSSRNLYIVLIRQVEIGFSDL  
FVVFNMLVGLTWCLYLP CFTNCSMHGLVRGENMELGRDSDTGGQVKYVVELARALANTEGVHRVDLLTR  
QISSPEVDYSYGEPEVEMLSCPPEGSDSCGSIIRIPCGSRDKYIPKESLWPHIPEFVDGALNHIVSIARS  
LGEQVNGGKPIWPYVIHGHYADAGEVA AHLAGALNVPMLTGHSLGRNKFEQLLQQGRITREDIDRTYKI  
MRRIEAEEQSLDAAEMVVTSTRQEIDAQWGLYDGF DIKLERKLRVRRRRGVSC LGRYMPRMVVIPPGMDF  
SYVLTQDSQEPDGLDKSLIGPDRNQIKKPVPPIWSEIMRFFSNPHKPTILALSRPDHKKNVTTLVKAFGE  
CQPLRELANLV LILGNRDDIEMPNSSSVLMNVKLIDQYDLYGQVAYPKHHKQSEVPDIYRLAAKTG  
VFINPALVEPFGLTIEAAAYGLPIVATRNGGPVDIVKALNNGLLVDPHDQQAISDALLKLVANKHLWAE  
CRKNGLKNIHRFSWPEHCRNLYSHVEHCRNRHPTSSLDIMKVPEELTSLSLRD VDDISLRFSTEGDFTLN  
GELDAGTRQKKLVD AISQMNSMKGCSAAIYSPGRRQMLFVVAVDSYDDNGNIKANLNEIKNMIKAADLT  
SGKGKIGFVLASGSSLQEVVDITQKNLINLEDFDAIVCNSGSEIYYPWRDMMVDADYETHVEYKWPGESI  
RSVILRLICTEPAAEDDITEYASSCSTRCYAISVKQGVKTRRVDDLQRLRMRLRCNIVYTHAATRLNV  
IPLCASRIQALRYLSIRWGIDMSKT VFFLGEKGD TDYEDLLGGLHKT IILKG VVGSDSEKLLRSEENFKR  
EDAVPQESPNI SYVKENGGSQEIMSTLEAYGIK

>AtSPS5.1

MAGNDWVNSYLEAILDVGQGLDDARSSPSLLLREGRFTPSRYFVEEVITGYDETLHRSWVKAVATRSP  
QERNTRLENMCWRIWNLARQKQHEEKEAQR LAKRRLEREKGRREATADMSEEFSEGEKGDII SDISTHG  
ESTKPRLP RINSAESMELWASQQGNKLYLV LSLHGLIRGENMELGRDSDTGGQVKYVVELARALGSM P  
GVYRVDLLTRQVSSPDVDSYGEPTMLTPRDEDFSD EMGESSGAYIVRIPFGPKDKYIPKELLWPHIP  
EFVDGAMSHIMQMSNVLGEQVGKPIWPSAIHGHYADAGDATAALLSGALNVPMLLTGHSLGRDKLEQLL

RQGRLSKEINSTYKIMRRIEGEELSDVSEMVITSTRQEIDEQWRLYDGFDPILERKLRARIKRVSCY  
GRFMPRMVKIPPGMEFNHIVPHGGDMEDTDGNEEHPTSPDPPIWAEIMRFFSNSRKPMILALARPDPKKN  
ITTLVKAFGECRPLRELANLALIMGNRDGIDEMSSTSSSVLLSVLKLDKYDLYGQVAYPKHHKQSDVPD  
IYRLAAKSKGVFINPAIIEPFGLTIEAAAHGLPMVATKNGGPVDIHRVLDNGLLVDPHDQQSISEALLK  
LVADKHLWAKCRQNGLNKNIHQFSWPEHCKTYLSRITSFKPRHPQWQSDDGGDNSEPESPDSLRIQDIS  
LNLKFSFDGSGNDNYMNQEGSSMDRKSIEAAVQNWWSKGKDSRKMGSLESEVNSGKFPVRRRKFIIVVI  
ALDFDGEEDTLEATKRILDAVEKERAEGSVGFILSTSLTISEVQSFLVSGGLNPNDFDAFICNSGSDLHY  
TSLNNEGDPFVVDLYYHSHIEYRWGGEGRLKTLIRWASSLNEKKADNDEQIVTLAEHLSTDYCYTFTVKK  
PAAVPPVRELKLLRIQALRCHVVYSQNGTRINVIPVLASRIQALRYLFVRWGLIDMAKMAVFGESGDTD  
YEGLLGGLHKSVDLVKGVSCSACLHANRSYPLTDVISFESNNVHASPDSDVRDALKKLELLKD

>AtSP5.2

MVGNDWVNSYLEAILAAEPGIANSKPPGTGDSKSSLLLRERGHFSPTRYFVEEVITGFDETDLHRSWVQA  
AATRSPQERNTRLENLCWRIWNLARQKKQVEGKNAKREAREREREKARREVTAE MSEDFSEGEKADLPG  
EIPTSDNNTKGRMSRISSVDVFENWFAQHKEKKLYIVLISLHGLIRGENMELGRSDTGGQVKYVVELA  
RALGSMGPVYRVDLLTRQVTAPDVDSSYSEPMNLNPIDTDIEQENGESSGAYIIRIPFGPKDKYVPKEL  
LWPHIPEFVDRALSHIMQISKVLGEQIGGGQVWPVSIHGHYADAGDSTALLSGALNVP MVFTGHSLGRD  
KLEQLLKQGRPKKEINSNYKIWRRIEAEELCLDASEIVITSTRQEVDEQWRLYDGFDPVLERKLARMKR  
GVSCGRFMPRMVVIPPGMEFHIVPHDADGD DENPQTADPPIWSEIMRFFSNPRKPMILALARPDPK  
KNLVTLVKAFGECRPLRELANTLIMGNRNDIDELSSSTNSSVLLSILKLIDKYDLYGQVAMPKHHQSDV  
PEIYRLAAKTGCVFINPAFIEPFGLTIEAGAHGLPTVATINGGPVDIHRVLDNGLLVDPHDQQAIADAL  
LKLVSQRQLWGRCRQNGLNNIHLFSWPEHCKTYLARIASCKQRHPKWQRVEFENS DSDSPDSLRI DINDI  
SLNLKSLDGEKSGSNNGVDNLDAEDRAERKAEVEKAVSTLAQKSKPTEKFDSKMPTLKRKNIFVIS  
VDCSATS DLLAVVKTVIDAAGRSSTGFILSTSMTISETHTALLSGGLKPQDFDAVICSSGSELYFTSSG  
SEDKTALPYTLDADYHSHIEFRWGGESLRKTLIRWISSVEKKKTKKGEILVEDESSSTNYCLSFVKDP  
ALMPPMKELRKLMRNQALRCNAVYCQNGARLNVIPVLASRSQALRYLLVRWGLDLSNMVVFVGD SGDTDY  
EGLLGGIHKTIVLKGLASDLREQPGNRSYPMEDVTPLNSPNITEAKECGRDAIKVALEKLGISLLKP

>SISPS1

MAGNDWINSYLEAILDVGPGLDKSSLLLRERGRFSPTRYFVEEVITGFDETDLHRSWIRAQATRSPQERNTRLENMCW  
RIWNLARQKKQLEGEQARWMAKRRQERERGRREAVADMS EDLSEGEKGDIVTDMSSHGESTRGRLPRISSVETMEAWVSQ  
QRGKKLYIVLISLHGLIRGENMELGRSDTGGQVKYVVELARALGSMGPVYRVDLLTRQVSSPEVDWSYGEPT EMLTPIS  
TDGLMSEMGESSGAYIIRIPFGPREKIYKEQLWPYIPEFVDGALNHIIQMSKVLGEQIGNGHPVWPVAIHGHYADAGDS  
AALLSGALNVPMLFTGHSLGRDKLEQLLRQGRLSKDEINSTYKIMRRIEAEELTDASEIVITSTRQEIDEQWRLYDGF  
PILERKLRARIKRVSCYGRFMPRMAVIPP GMEFHIVPHEGDMGDTEGSEDGKIPDPPIWAEIMRFFSNPRKPMILAL  
ARPDPKKNLTTLVKAFGECRPLRELANTLIMGNRNDIDEMSSTNSALLSILKMIDKYDLYGQVAYPKHHKQSDVPDIY  
RLAAKTGCVFINPAFIEPFGLTIEAAAYGLPMVATKNGGPVDIHRVLDNGLLVDPHDQQAIADALLKL VADKQLWAKCR  
ANGLKNIHLFSWPEHCKTYLSRIASCKPRQPRWLRPDDDDENSETDSPDSLRIHDISLNLRFSLDGEKNDNKENADS  
TLDPEVRKSKLENAVLSLSKGAPKSTSKSWSSDKADQNP GAGKFAIRRRRHIFVIAVDCDASSGLSGSVKKIFEAVEKE  
RSEGSIGFILASSFNISEVQSFLVSEGMSPDTDFDAYICNSGGDLYYSSFHSEQNPVVDLYYHSHIEYRWGGEGRLKTLV  
RWAASITDKNGENG EHVVEDEDNSADYCYTFKVKPGKVPPAKELRKVMRIQALRCHAVYCQNGSRINMIPVLASRSQA  
LRYLYLRWGMDSLKLVFVGESGDTDYEGLIGLRKAVIMKGLCTNASSLIHG NRNYPLSDVLPFDSPNVIQADEECSS  
EIRSLLEKLAVLKG

>SISPS2

MAGNEWINSYLEAILDVGPPINDPKSSLLLRERGRFSPARYFVEEVITGFDETDLHRSWVRASSIRDSQERNTRLENMCW  
RIWNLTRKKKQLEGEAAQRVAKRHRERERARREATVDMSDLSDGEKVDIVGDLSTHGDSVRGRMSRVSSVDAMANWANQY

TEKKLYIVLISLHGLIRGENMDLGRSDTGGQVKYVVELARALGMMPGVYRVDLLTRQVSAPDVDWTYGEPTMINLTDS  
LDAMPEVGESGGAYIIRIPFGPKDKYIPKELLWPHIPEFVDGALGHIVQMSKVLGEQTGSGQPLWPVAIHGHYADAGESA  
ALLSGALNVPMLVTGHS�GRDKLEQLLKQGRQPKEINATYKIMRRIEAEELS LDVSEMIITSTRQEIEEQWNLYDGFDP  
KLERKLRARSKRSVSCYGRFMPRAMVIPPMEFHIIIPLEGMDGGEVEGNEHNVGSADPPIWLEIMRFFTNP HKPMILAL  
ARPD PKKNLITLVKAFGECRQLRELANLTVMGNRDVIDEMSSTNSSVLVSIK LIDKYDLYGQVAYPKHHKQSDVPEIY  
RLAAKSKGVFINPAFIEPFGLTIEAAAHGLPMVATKNGGPVDIHRVLDNGLLVDPHDQHSVADALLKL VADKQLWARCR  
DNGLRNIHLFSWPEHCKTYLSRVMFCKQRQPKWK RNEDECS DSEPDS PEDSLRDIKDSL SLSKLSLDGDKNEKSGTSVTA  
LDFVENATKKKSQ LDRMVSTLPVTKSMEKSEQSKFQLSRRRKLIVIAADC DTPAGLADVAKTIIETVKDKNTSSIGFIL  
STALTISEVQSILELSKFPHDFDAYICNSGGEVYPCSSSEEKYLEPSFTVDS DYQTHIDYRWGGEDLRKTIIRWADSL  
NDKVKNKAEIAIKEIDSASAHCF SFRINDQSLVPPVKEVRRLLRIQALRCHAIY CQSGSRLNVIPVLASRSQALRYMFIR  
WGINLSNLVVFAGESGDTDYEFVGGVHKTVVLNGVCSDASKVHSNRNYPLEHVL PAMNSNIIECGSCSKEDISVALNNL  
GFSKE

>SISPS3

MAGNEWINGYLEAILSSGASAIEDKKPSSTTTSSHLNLAERANFNPTKYFVEEVVTGVD ETLHRTWIKV VATRNTRE RS  
SRLENMCWRIWHLARKKKQLEWEDLQRSANRRLERELGRKDVTE DMSEDLSEGEKGDVLGETPTLDS PRKRFRQNF SNLE  
VWSDSNKEKKLYIILVSLHGLVRGENMELGRSDTGGQIKYVVELAKALAKMPGVYRVDLFTRQ IASTEVDWSYGEPTEM  
LNTGPEDGDDTDLGESSGAYIIRIPFGPRDKYLRKELLWPYIQEFVDGALAH IINMSKALGEQIGGGQP VWPYVIHGHYA  
DAGDSAALLSGALNVPMLVTGHS LGRNKLEQLIKQARQSKEDINSTYRIMRRIEGEELS DAAELVITSTKQEIDEQWGL  
YDGFVDKLEKVLRARARRGVNCHGRFMPRMAVIPP GMDFSNVVDQEDTADADGDLAALT NVDGQSPKAVPTIWSEIMRFL  
TNPHKPMILALS RPD PKKNITTLVKAFGECRPLRELANLTLMGNRDDIDEMSAGNASVLT TVKLVD RYDLYGQVAFPK  
HHKQSDVPEIYRLAGKTG VFINPALVEPFGLTIEASAHGLPMVATKNGGPVDIHRALN NGLLVDPHDQQA IADALLKL  
VSEKNLWHECRKNGWKNIHLFSWPEHCRTYLTRIAACRMRHPQWKTDNPSDELAAEES LNDSLKDVQDMSLRLSVDGEK  
TSLNESFDASATADAVQDQVNRVLSKMKRPETSKQSEGD KKNVPSKYPM LRRRRKLIVIALDCYDTNGAPQKKMIQII  
QEILKTIKSDPQVARVSGFAISTAMSMSELA AFLISGNIKVTEFDALICSSGSEVFYPGTSSEE HGKLYPD PDYSSHIEY  
RWGGDGLRKTIWKL MNTQEGKEEKSVTCAIEEDVKSSNSHCISYLIKDRSKAKKVDDMRQKL RMRGLRCHLMYCRNSTRM  
QVVPLLASRSQALRYL FVRWRLNVANMCVILGETGDTDYEELISGTHKTLILKGAVEEGSEN LLRTSGSYLREDVVPPE S  
PLIYTGGNETVEEFANALKQVCR

>SISPS4

MAENEWLNGYLEAILDVGSERN GSRQKKPISSNNFKHNNMEEILRLEIHKEKLF SPTKYFVEEVVNSFDES DLHRTWIKV  
VATRNCRERNRNL ENMCWRIWHLTRKKQIAWDDA QKLVKRRVELEKGRFDA AEDLSESEGEKEKGDINTSESHHVISR  
INSDTQIWSDEDKPSQLYIVLISMHGLVRGENMELGRSDTGGQVKYVVELARALANMKG VHRVDLLTRQITSPD VDSY  
GEYIPKESLWPYIPEFVDGALSHIVNMARAIGE QVNAGKAVWPYVIHGHYADAGEVAARLSGTLNVPMLVTGHS LGRNKF  
EQLLKQGRLTGKEINTTYKIMRRIEAEELGLDTAEMVITSTRQEIDEQWGLYDGFDIQLERKLRVRRRRGV SCLGRYMPR  
MVVIPP GMDFSNIKAQDSLEGDGLKSLIGA AKSQKRPIPHIWSEIMRFFVNPHKPMILALS RPD PKKNVT TLLRAFGE C  
QALRELANLT LILGNRDDIDDMSSSSSAVLT TVIKLIDKYNL YGQVAYPKHHKQPEVPDIYRLAAKTKGVFINPALVEPF  
GLTIEAAAYGLPIVATKNGGPVDIVKALHNGLLD PHDQKAIEDALLKL VADKNLWLECRKNGLKNIHCF SWPEHCRNY  
LSHVQHCRNRHPANCLEVMKPAPEEPMSES LR DVEDLSL KFSIDVDFKANGEMDMARRQHELVEILSRKANSINKPIVSY  
SPGRRKVLV VVATDCYNSNGSPTETLSLVKNIMQVARSRSSQIGLLFLTGLCLQETKEV VNSCPTNLED FDALICSSGS  
EIYYPWKDLGLDDDYEAHIEYRWPGENIKSAVMRLGKIEEGSEHDIAQCPSASSFQCYSYSIKPGA EVRKVNDLRQRLRM  
RGFR CNVVYTHAASRLNVTPLFASRSQALRYLSVRWGV DLSM VV FVGKGDTDYESLLVGLHKT VILKRSVEYASEKL  
HNEDSFKTDEIVPPESTNICAAEGYEPQDISAALEKLGVM

>NtSPS1

MAGNDWINSYLEAILDVGP GIEDKKSSLLLRERGRFSPTRYFVEEVITGFDETLHRSWVRAQATRS PQE  
RNTRLENMCWRIWNLARQKKQLEGEQAQWMAKRRQER EKRREAVADMSEDLSEGEKGDVVSDIPSHGES

TKGRLPRISSVETMEAWVNQQRGKKLYIVLISLHGLIRGENMELGRSDTGGQVKYVVELARALGSMPGV  
YRVDLLTRQVSSPEVDWSYGEPTTEMLPPRSTEGLMTEMGESSGAYIIRIPFGPREKYIPKEQLWPYIPEF  
VDGALNHIIQMSKVLGEQIGNGYPVWPVAIHGHYADAGDSAALLSGALNVPMLFTGHSLGRDKLDQLLRQ  
GRLSKDEINSTYKIMRRIEAEELTDASEIVITSTRQEIDQWRLYDGFDPILERKLRARIKRVSCYGR  
FMPRMAVIPPMEFHIVPHEGDMGDGETEGEDGKAPDPPIWTEIMRFFSNPRKPMILALARPDPKKNLT  
TLVKAFGECPRLRELANMLIMGNRDNIDEMSSTNSSVLLSILKMIDKYDLYGQVAYPKHHKQADVPIY  
RLAAKTGKGFINPAFIEPFGLTIEAAAYGLPMVATKNGGPVDIHRVLDNGLLVDPHDQQAIAADALLKV  
ADKHLWAKCRANGLKNIHLFSWPEHCKTYLSRIASCKPRQPRWLRNDDDDDENSETDSPSDSLRDIHDIS  
LNLRFSLDGEKNDNKENADNTLDPEVRKSKLENAVLSWSKGVLKSTPKAWSSDKGDQNSGPGKFPAIRRR  
RHIFVIAVDCDASSGLESVRKIFEAVEKERAEGSIGFILASSFNISQVQSFLVSEGMPKPTDFDAYICNS  
GGDLYSSFHSEQNPVVDLYYHSHIEYRWGGELRKTIVRWAASIIDKKGENEDHIVVEDEDNSADYCY  
TFKVRKLTGTPPAKELRKLMRIQALRCHAVYCQNGSRINVIPVLASRSQALRYLYLRWGMDSLKLVFVG  
ESGDTDYELIGGLRKAVIMKGLCASASSLIHGNSNYPLSDVLPFDSPPNVQSAEECSSTEIRSSLEKLG  
VLKG

>NtSPS2

MAGNEWINGYLEAILSSGASAIEDKTPSSSTTSSHLNLAERANFNPTKYFVEEVVTGVDLHRTWIKV  
VATRNTRERSSRLNMCWRIWHLARKKKQLEWEDVQRSANRRLEREQGRKDVTEDMSEDLSEGEKGDVLG  
ETPTLDSPRKRFQRNFSNLEVWSDSNKEKKLYIILVSLHGLVRGENMELGRSDTGGQIKYVVELAKALA  
KMPGVYRVDLFRQIASTEVDWSYGEPTTEMLNTGPEDGDDTDLGESSGAYIIRIPFGPRDKYLRKELLWP  
YIQEFVDGALAHIIINMSKALGEQIGGGQPVPYVIHGHYADVGDASAALLSCALNVPMLTGHSLGRNKLE  
QLIMQAMQSKEDINSTYRIMRRIEGEELSDAAELVITSTKQEIDQWGLYDGFVKLEKVLRARARRGV  
NCHGRFMPRMAVIPPMDFTNVVDQEDTADADGDLAALTNDGQSPKAVPTIWSEVMRFLTNPHKPMILA  
LSRPDPKKNITTLVKAFGECPRLRELANTLIMGNRDDIDEMSAGNASVLTTLVKLVDYDLYGQVAFPK  
HHKQSDVPEIYRLAGKTGKGFINPALVEPFGLTIEASAHGLPMVATKNGGPVDIHRALNGLLVDPHDQ  
QAIAADALLKVSEKNLWHECTKNGWKNIHLFSWPEHCRTYLRIAACRMRHPQWKTDNPSDELAEESSL  
NDSLKDVQDMSLRLSVDGEKTSLNESFDASATADAVQDQVNRVLSKMKRSETSKQESEGDKDNVPSKYP  
MLRRRRKLIVIALDCYDTNGAPQKKMIQIIQEILKTIKSDPQVARVSGFAISTAMSMSELAFLKSGNIK  
VTEFDALICSSGSEVFYPTGSSEEHGKLYPDYSSHIEYRWGGDGLRKTIVKLMNTQEGKEEKSVTCAI  
EEDVKSSNSHCISYLIKDRSKAKKVDDMRQKLRMRLRCHLMYCRNSTRMQVPLLASRSQALRYLFVRW  
RLNVANMCVILGETGDTDYELISGHTKLILKGAVEEGSENLLRTSGSYLREDVVPPEPLITFTSGNE  
TVEEFANALRQVSR

>NtSPS3

MAENEWLNGYLEAILDAGTDRNGTQKERKASSIEDRNNLKNTSVRDNNKIEETLRFKFEIQKEKAELF  
SPTTYFVEEVVNSFDESDLHKTWIKVVATRNSRERNRLENMCWRIWHLARKKKQIAWDDAQKLVIRRL  
LEKGRFDALEDLSELSEGEKEKTDVNTSDSHHVSRINSVTQMWPDEDKPRQLYIVLISIHGLVRGENME  
LGRSDTGGQVKYVVELARALANMEGVHRVDLLTRQITSPEVDSSYGEPIEMLSCPSHAFGSCGAYIVRI  
PCGPRDKYIPKESLWPYIPEFVDGALSHIVNMARAIGEQVNAGKAVWPYVIHGHYADAGEVAARLSGTLN  
VPMVLPGLHSLGRNKFQLLKQGRLTKEINTTYKIMRRIEGEELGLDAAEMVVTSTKQEIDQWGLYDGF  
DIQLERKLVRRRRGVSCLGRYMPRMVIPPMDFSNVNAQDLLEGDGLKSLIGTDKSQKRPIPIHWSE  
IMRFFVNPHKPMILALSRDPKKNVTLLRAFGECQALRELANTLILGNRDDIDDMSSSSSAVLTTVIK  
LIDKYNLYGQVAYPKHHKQPDVPIYRLAAKTGKGFINPALVEPFGLTIEAAAYGLPIVATKNGGPVDI  
LKALNGLLIDPHDQQAIAADALLKVADKNLWLECRKNGLKNIHRFSWPEHCRNYLSHVQHCRNRHPANR  
LEVMPKPTLEPMSESLRDVEDLSLKFSIDVDFKANGELDMARRQQELVEKLSRKANSISKPIISYCPGRR  
QVLYVVATDCYNSKGTPTETLSLTVKNIMQVAGSRSSQIGLVSTGLSLDETKEALNSCPTNLEDFDALI

CSSGSEIYYPWRDFGLDEDYEAHIEYRWAGENIKSAVMRLGKHEEGSEHDIAQCSSACSSRCYSYSITPG  
AKVPKVNDLRQRLMRGFRCSVIYTHAASRLNVTPLFASRSQALRYLSVRWGVGLSSMVVVFVGEKGDY  
EGLLVGLHKTIVLKGSVEHASEMLLNEDSFRTDDVVPQDSTNICVAEGYEPQDISAALEKLEVM
