# Supplementary material
Source: MDPI journal article supplement (https://www.mdpi.com/2311-7524/9/4/511)
Supplement: s1 [file s1 › Supplementary file 3.xlsx]

## Sheet: Sheet1
	Expression values of the four StSPS genes in the Ensembl Plants database
		Root	Stem	Leaf	Flower	Stolon	Tuber pith	Tuber cortex	Tuber sprout
	StSPS1	159	212	114	100	37	209	320	202
	StSPS2	below cutoff	below cutoff	below cutoff	37	2	below cutoff	below cutoff	below cutoff
	StSPS3	7	3	37	76	1	71	83	7
	StSPS4	16	3	8	3	5	4	7	5
