# Supplementary material
Source: MDPI journal article supplement (https://www.mdpi.com/2311-7524/9/4/511)
Supplement: s1 [file s1 › Supplementary file 4.pdf]

#### Supplementary file 4

##### Gene and protein sequences of StSPS1 in the Chuanyu 10 potato cultivar

>StSPS1-gene

ATGGCGGGAAACGATTGGATTAACAGTTACTTAGAGGCGATACTGGATGTAGGACCAGGGCTAGATGA  
TAAGAAATCATCGTTGTTGTTGAGAGAAAGAGGGAGGTTTAGTCCGACGAGGTACTTTGTTGAGGAA  
GTTATTACTGGATTCGATGAGACTGATTTGCATCGTTTCGTGGATCCGAGCACAAAGCTACTCGGAGTCCG  
CAGGAGAGGAATACTAGGCTCGAGAATATGTGCTGGAGGATTTGGAATTTGGCTCGCCAGAAAAAGC  
AGCTTGAGGGAGAGCAAGCTCAGTGGATGGCAAAACGCCGTCAAGAACGTGAGAGAGGTTCGCAGAG  
AAGCAGTTGCTGATATGTCAGAGGATCTATCTGAGGGAGAGAAAGGAGATATAGTCGCTGACATGTCA  
TCTCATGGTGAAAGTACCAGAGGCCGATTGCCTAGAATCAGTTCTGTTGAGACAATGGAAGCATGGGT  
CAGTCAGCAGAGAGGAAAGAAGCTTTATATCGTGCTTATAAGTTTACATGGTTTAATTCGGGGTGAGAA  
TATGGAGCTTGGACGGGATTCTGATACTGGTGGTCAGGTGAAGTATGTTGTTGAACTTGCAGGGGCCTT  
AGGGTCGATGCCAGGTGTATATCGGGTTGACTTGCTTACTAGACAAAGTATCTTCACCAGAAGTAGATTG  
GAGCTATGGTGAACCGACAGAGATGCTGACGCCAATAAGTACAGACGGCTTGATGACTGAGATGGGG  
GAGAGTAGTGGTGCTTATATTATTCGCATTCCTTTTGGACCAAGAGAGAAATATATTCAAAAGAACAG  
CTATGGCCCTATATTCCCGAATTTGTTGATGGTGCACCTTAATCATATTATTCAAATGTCCAAAGTTCTTGG  
TGAGCAAATTGGTAGTGGCTATCCTGTGTGGCTGTTGCCATACATGGACATTATGCTGATGCTGGCGA  
CTCAGCTGCTCTCCTGTGCGGTGCTTTAAATGTACCAATGCTTTTCACTGGTCACTCGCTTGGTAGAGA  
TAAGTTGGAGCAACTGTTGCGACAAGGTCGTTTGTCAAAGGATGAAATAAACTCAACCTACAAGATAA  
TGCGGAGAATAGAGGCTGAAGAATTAAGTCTTGATGCTTCCGAAATTGTCATCACTAGTACAAGACAG  
GAGATTGACGAGCAATGGCGTTTGTATGATGGGTTTATGATCCAATATTAGAGCGTAAGTTACGTGCAAGG  
ATCAAGCGCAATGTCAGCTGTTATGGCAGGTTTATGCCTCGTATGGCTGTAATTCCTCCTGGGATGGAG  
TTCCACCATATTGTGCCACATGAAGGTGACATGGATGGTGAACAGAAAGGAAGTGAAGATGGAAAGA  
CCCCGGATCCACCTATTTGGGCAGAGATTATGCGCTTCTTTTCTAATCCAAGGAAGCCTATGATACTCGC  
ACTTGCTAGGCCAGATCCCAAGAAGAACCTCACTACTTTAGTGAAAGCATTGTTGGTGAATGTCGTCCAT  
TGAGAGAGCTTGCTAATCTTACTTTGATAATGGGTAATCGAGATAATATCGACGAAATGTCTAGACCA  
ATTCTGCACTTCTTCTTTCAATCTTGAAGATGATAGATAAGTATGATCTTTATGGTCAAGTAGCTTATCCT  
AAACACCACAAGCAGTCAGATGTTCTGATATCTACCGTCTTGCTGCAAAGACTAAGGGTGTTTTTATT  
AATCCAGCTTTTATTGAGCCTTTTGGACTGACTTTGATTGAGGCAGCAGCTTATGGTCTCCCAATGGTA  
GCCACAAAAAATGGAGGACCTGTTGATATACATAGGGTTCTTGACAATGGTCTCTTAGTGGATCCCCAT  
GATCAGCAGGCAATTGCTGATGCTCTTTTGAAGTTGGTTGCTGATAAGCAACTGTGGGCTAAATGCAG  
GGCAAATGGATTAAAAAATATCCACCTTTTCTCATGGCCCGAGCACTGTAAAACTTATCTATCCCGGATA  
GCTAGCTGCAAACCAAGGCAACACGCTGGCTGAGATCCAATGATGATGATGATGAAAATTCAGAAAC  
AGATTCACCTAGTGATTCTTGAGAGATATTCATGATATATCTCTGAATTTGAGATTTTCATTAGATGGGG  
AAAAGAATGACAATAAAGAAAATGCTGATAATACATTAGACCCCGAAGTTCGAAGGAGCAAGTTAGA  
GAATGCTGTTTTGTCCTTATCTAAGGGTGCCTGAAGAGCACATCAAAATCTTGGTCGTCAGACAAGG  
CAGACCAAAACCCCTGGTGCTGGTAAATCCCAGCGATTAGGAGGAGGCGACATATTTTGTATTGCA  
GTGGATTGTGATGCTAGCTCAGGACTCTCTGGAAGTGTGAAAAAGATATTTGAGGCTGTAGAGAAGGA  
AAGGGCAGAGGGTTCCATTGGATTTATCCTTGCTACATCTTTCAATATATCAGAAGTACAGTCTTTCCTG  
CTTTCAGAGGGCATGAATCCTACTGATTTTGATGCTTACATATGCAATAGCGGTGGTGATCTTATTATTC  
GTCCTTCCATTCTGAGCAAAATCCTTTTGTAGTTGACTTGTACTATCACTCACATATTGAGTATCGTTGG  
GGGGGCGAAGGGTTGAGAAAGACTTTGGTGCGTTGGGCTGCCTCTATCATTGATAAGAATGGTGAAAA  
TGGAGATCACATTGTTGTTGAGGATGAAGACAATTCAGCTGACTACTGCTATACATTCAAAGTCTGCAA  
GCCTGGGACGGTTCCTCCATCTAAAGAGCTTAGAAAAGTAATGCGAATTCAGGCACTTCGTTGTCACG

CTGTTTATTGTCAAAATGGGAGTAGGATTAATGTGATCCCTGTACAGGCATCTCGGTCCCAAGCACTCA  
GGTACTTATATCTGCGATGGGGAATGGACTTGTCTGAAGTTGGTGGTTTTTCGTCTGGAGAAAGTGGTGATA  
CCGATTATGAAGGATTGATCGGTGGTCTACGCAAGGCTGTCATAATGAAAGGACTCTGCACATAATGCAA  
GCAGCTTAATTCACGGTAATAGGAATTACCCGCTATCTGATGTTTTACCATTGACAGCCCTAATGTCAT  
CCAAGCGGATGAGGAATGTAGCAGCACCGGAATCCGTTCTTACTGGAGAACTAGCGGTACTCAAA  
GGATAA

>StSPS1-protein

MAGNDWINSYLEAILDVGPGLDDKKSSLLLRERGRFSPTRYFVEEVITGFDETDLHRSWIRAQATRSPQER  
NTRLENMCWRIWNLARQKKQLEGEQAQWMAKRRQERERGRREAVADMSEDLSEGEKGDIVADMSSHG  
ESTRGRLPRISSVETMEAWVSQQRGKKLYIVLISLHGLIRGENMELGRDSDTGGQVKYVVELARALGSMF  
GVYRVDLLTRQVSSPEVDWSYGEPTMLTPISTDGLMTEMGESSGAYIIRIPFGPREKYIPKEQLWPYIPEFV  
DGALNHIIQMSKVLGEQIGSGYPVWPVAIHGHYADAGDSAALLSGALNVPMLFTGHSLGRDKLEQLLRQ  
GRLSKDEINSTYKIMRRIEAEELTDASEIVITSTRQEIDEQWRLYDGFDPILERKLRARIKRVNSCYGRFMP  
RMAVIPPGMFHHIVPHEGDMMDGETEGSEDGKTPDPPIWAEIMRFFSNPRKPMILALARPDPKKNLTTLVK  
AFGECRPLRELANTLIMGNRDNIDEMSSTNSALLLSILKMIDKYDLYGQVAYPKHHKQSDVPDIYRLAAK  
TKGVFINPAFIEPFGLTLIEAAAYGLPMVATKNGGPVDIHRVLDNGLLVDPHDQQAADALLKLVDKQLW  
AKCRANGLKNIHLFSWPEHCKTYLSRIASCKPRQPRWLRSNDDDDENSETDSPSDSLRDIHDISLNLRFSL  
DGEKNDNKENADNTLDPEVRRSKLENVLSLSKGALKSTSKSWSSDKADQNPAGKFPAIRRRRHIFVIA  
VDCDASSGLSGSVKKIFEAVEKERAEGSIGFILATSFNISEVQSFLLEGMNPTDFDAYICNSGGDLYYSSFH  
SEQNPFVVDLYYHSHIEYRWGGEGRLKTLVRWAASIIDKNGENGHDHIVVEDEDNSADYCYTFKVCKPGTV  
PPSKELRKVMRIQALRCHAVYCNQSRINVIPVQASRSQALRYLYLRWGMDSLKLVVFGESGDTDYEGL  
IGGLRKAVIMKGLCTNASSLIHGNRNYPLSDVLPFDSPNVIQADEECSSTGIRSLLEKLAVLKG\*
